# Supplementary material for: In Vitro Characterization of Gut Microbiota-Derived Commensal Strains: Selection of Parabacteroides distasonis Strains Alleviating TNBS-Induced Colitis in Mice
Source: PubMed Central journal article supplement (PMC7565435; doi:10.3390/cells9092104), 2020-09-16
Supplement: cells-09-02104-s001.pdf [file cells-09-02104-s001.pdf]

**Supplementary Table 1:** Forward and reverse primers used in the study for the respective genes encoding TATA-Box Binding Protein, IL-1 $\beta$ , IL-6, TNF- $\alpha$ , CXCL-2, ZO-1 and Occludin.

|            |                                   |
|------------|-----------------------------------|
| Tbp-F      | 5'-TGGTGTGCACAGGAGCCAAG-3'        |
| Tbp-R      | 5'-TTCACATCACAGCTCCCCAC-3'        |
| Il1b-F     | 5'-TTGACGGACCCCAAAAGATG-3'        |
| Il1b-R     | 5'-AGAAGGTGCTCATGTCCTCA-3'        |
| il6-F      | 5'-AGCCAGAGTCCTTCAGAGAGATAC-3'    |
| il6-R      | 5'-ATTGGATGGTCTTGGTCCTTAGC-3'     |
| tnfa-F     | 5'-CCCTCACACTCAGATCATCTTCTC-3'    |
| tnfa-R     | 5'-GGCTACAGGCTTGTCACTCG-3'        |
| cxcl2-f    | 5'-CAAAAGATACTGAACAAAGGCAA-3'     |
| cxcl2-R    | 5'-TCAGGTACGATCCAGGCTTCC-3'       |
| zo1-F      | 5'-GACTCCAGACAACATCCCGAA-3'       |
| zo1-R      | 5'-ACGCTGGAAATAACCTCGTTC 3'       |
| occludin-F | 5'-TCAGGGAATATCCACCTATCACTTCAG-3' |
| occludin-R | 5'-CATCAGCAGCAGCCATGTACTCTTCAC-3' |
